# Supplementary material
Source: MDPI journal article supplement (https://www.mdpi.com/1996-1073/13/18/4712)
Supplement: s1 [file s1]

# Microbial Structure and Energy Generation in Microbial Fuel Cells Powered with Waste Anaerobic Digestate

Dawid Nosek \* and Agnieszka Cydzik-Kwiatkowska

Department of Environmental Biotechnology, University of Warmia and Mazury in Olsztyn, Słoneczna 45 G, 10-709 Olsztyn, Poland; agnieszka.cydzik@uwm.edu.pl

\* Correspondence: dawid.nosek@uwm.edu.pl; Tel.: +48-89-523-4144, Fax: +48-89-523-4131

41 31

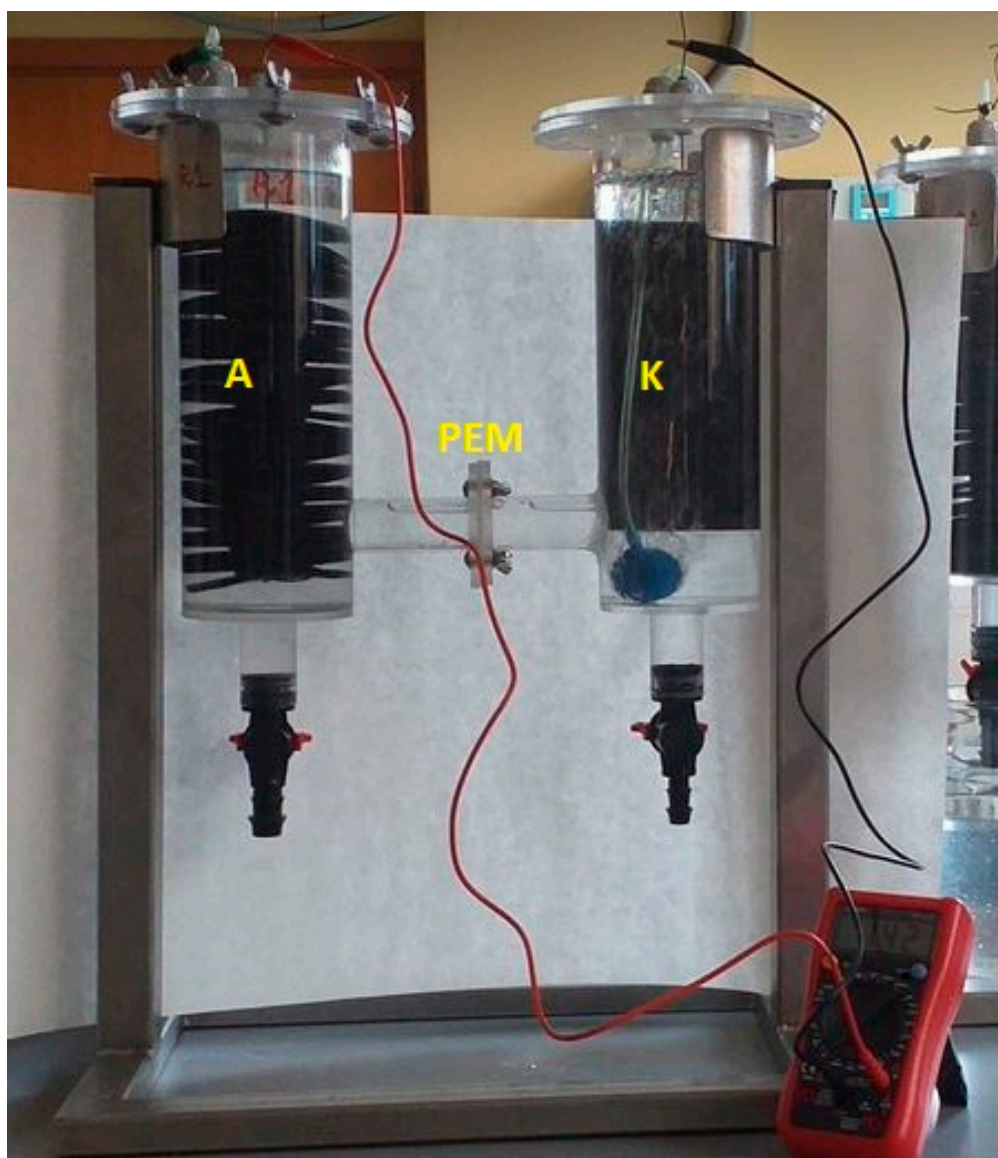

**Figure S1.** Design of a dual-chamber MFC reactor, where A – anode, K – cathode, PEM – membrane.

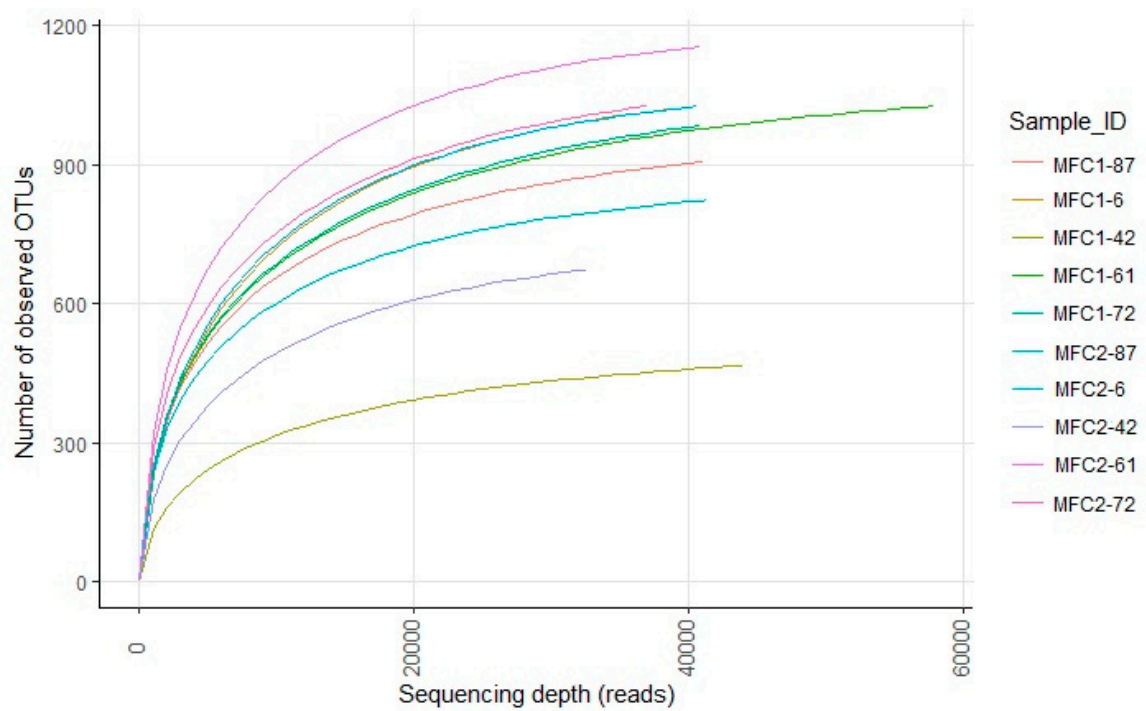

**Figure S2.** Rarefaction curves obtained for biomass samples collected from MFC1 and MFC2 during the experiment (in Sample\_ID the name of MFC and the day of sampling are given).
